# Supplementary material for: Keap1-Nrf2 Pathway Regulates ALDH and Contributes to Radioresistance in Breast Cancer Stem Cells
Source: PubMed Central journal article supplement (PMC7825579; doi:10.3390/cells10010083), 2021-01-06
Supplement: cells-10-00083-s001.pdf [file cells-10-00083-s001.pdf]

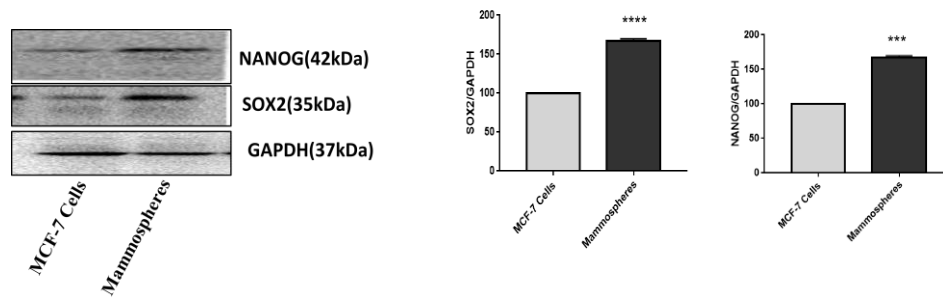

**Figure S1.** Characterisation of mammospheres. Expression of stem cell markers i.e. NANOG and SOX2 were analysed by western blotting GAPDH is used as loading control. All values are given as the mean  $\pm$  SE, \*\*\* $p$ <0.001 *vs* mammospheres. All images are representative of three independent experiments.

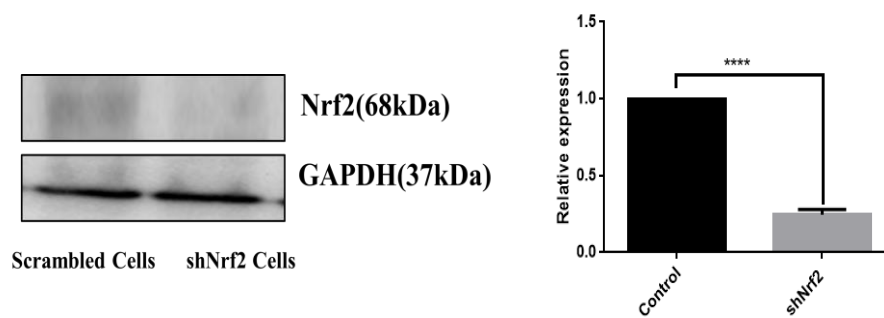

**Figure S2.** Nrf2 expression in Nrf2 knockdown cells. Expression of Nrf2 were analysed by western blotting and (B) RT-PCR. GAPDH is used as loading control. All values are given as the mean  $\pm$  SE, \*\*\* $p$ <0.001 *vs* shNrf2 cells. All images are representative of three independent experiments.



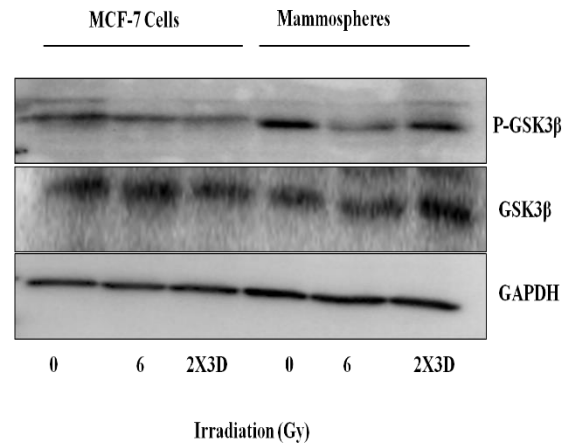

**Figure S3.** GSK3 $\beta$  levels in fractionated dose irradiated MCF-7 cells and mammospheres. Expression of p-GSK3 $\beta$  and GSK3 $\beta$  were analysed by western blotting. GAPDH is used as loading control.



| Gene Name               | Forward Primer                | Reverse Primer                |
|-------------------------|-------------------------------|-------------------------------|
| <b>Nrf2 (NEF2L2)</b>    | 5' -TCAGCGACGGAAAGAGTATGA- 3' | 5'-CCACTGGTTTCTGACTGGATGT-3'  |
| <b>Keap1</b>            | 5'-CTGGAGGATCATACCAAGCAGG-3'  | 5'-GGATACCCTCAATGGACACCAC-3'  |
| <b>HO1</b>              | 5'-AAGACTGCGTTCCTGCTCAAC-3'   | 5'-AAAGCCCTACAGCAACTGTCTG-3'  |
| <b>NQO1</b>             | 5'-GAAGAGCACTGATCGTACTGGC-3'  | 5'-GGATACTGAAAGTTCCGAGGG-3'   |
| <b>SOX2</b>             | 5'-GCCGAGTGGAACCTTTTGTCTG-3'  | 5'-GGCAGCGTGTACTTATCCTTCT-3'  |
| <b>NANOG</b>            | 5'-CCCCAGCCTTTACTCTTCCTA-3'   | 5'-CCAGGTTGAATTGTTCCAGGTC-3'  |
| <b>KLF4</b>             | 5'-CCCACATGAAGCGACTTCCC-3'    | 5'-CAGGTCCAGGAGATCGTTGAA-3'   |
| <b>CDH1(E-cadherin)</b> | 5'-TGCCCAGAAAATGAAAAAGG-3'    | 5'-GTGTATGTGGCAATGCGTTC-3'    |
| <b>VIM ( Vimentin)</b>  | 5'-CAGGAACAGCATGTCCAAATC-3'   | 5'-GGCAGCCACACTTTCATATTG-3'   |
| <b>SNAIL(SNAIL)</b>     | 5'-AGCCTGGGTGCCCTCAAGATG-3'   | 5'-CTTGCTGCTTGTGGAGCAGGGAC-3' |
| <b>SNAIL2 (SLUG)</b>    | 5'-GTCATACCACAACCAGAGATCC-3'  | 5'-GAGTATCCGGAAGAGGAGAGA-3'   |

**Table S1.** List of primers
